# Supplementary material for: Lactic acid and biomethane production from bread waste: a techno-economic and profitability analysis using pinch technology
Source: Royal Society of Chemistry journal article supplement (doi:10.1039/d3se00119a), 2023-01-01
Supplement: d3se00119a1.pdf [file d3se00119a1.pdf]

## Supplementary information

### **Lactic acid and biomethane production from bread waste: A techno-economic and profitability analysis using pinch technology**

**Swarnalatha Mailaram<sup>a</sup>, Vivek Narisetty<sup>b</sup>, Sunil K. Maity<sup>a,\*</sup>, Siddharth Gadkari<sup>c</sup>, Vijay Kumar Thakur<sup>d</sup>, Stephen Russell<sup>e</sup>, Vinod Kumar<sup>b,\*</sup>**

<sup>a</sup> Department of Chemical Engineering, Indian Institute of Technology Hyderabad, Kandi, Sangareddy-502285, Telangana, India

<sup>b</sup> School of Water, Energy and Environment, Cranfield University, Cranfield MK43 0AL, United Kingdom

<sup>c</sup> Department of Chemical and Process Engineering, University of Surrey, Guildford GU2 7XH, United Kingdom

<sup>d</sup> Biorefining and Advanced Materials Research Centre, Scotland's Rural College (SRUC), Edinburgh, United Kingdom

<sup>e</sup> Clothworkers' Centre for Textile Materials Innovation for Healthcare, School of Design, University of Leeds, Leeds LS2 9JT, United Kingdom

**\*Corresponding authors:**

1. Vinod Kumar, Phone: +44 (0) 1234754786, E-mail: Vinod.Kumar@cranfield.ac.uk.
2. Sunil K. Maity, Phone: +91-23016202, E-mail: sunil\_maity@che.iith.ac.in

**Table S1.** Capital investments for the distillation columns in US\$.

|     | Scenario I | Scenario II |
|-----|------------|-------------|
| DC1 | 438700     | 435700      |
| DC2 | 138200     | 138200      |
| DC3 | 198200     | 198200      |
| DC4 | 231900     | 231900      |
| DC5 | 163000     | 163000      |
| DC6 | 109400     | 107100      |

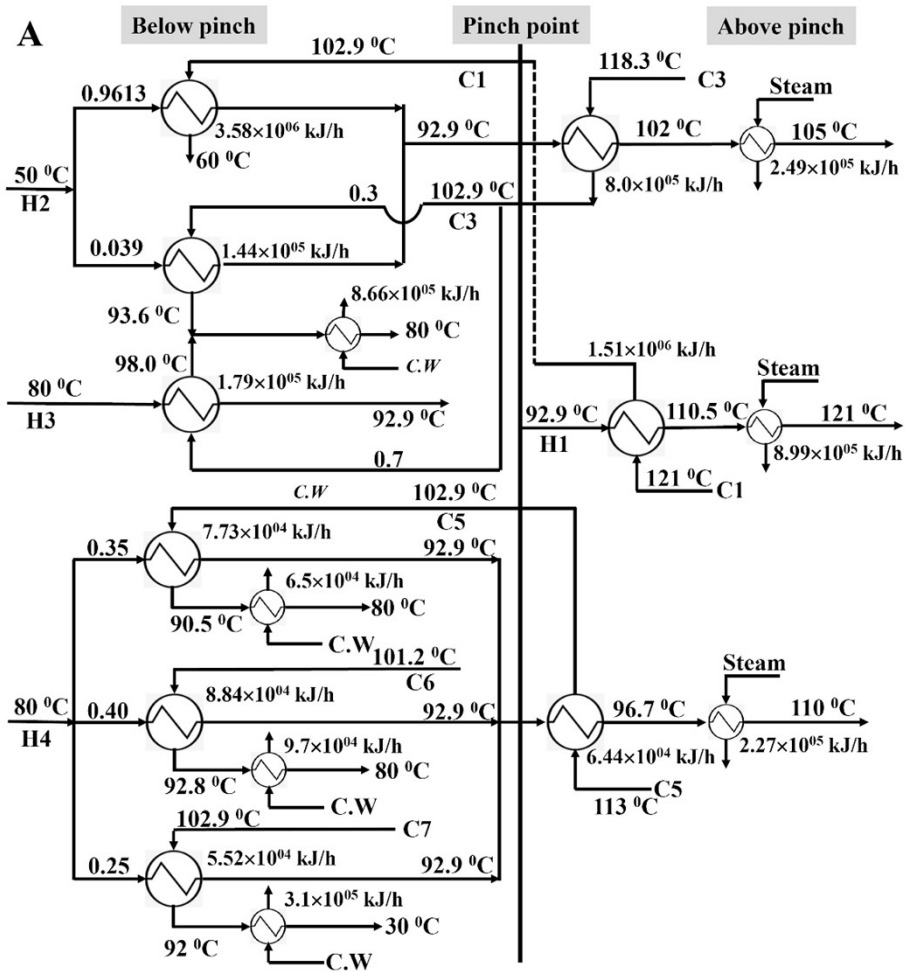

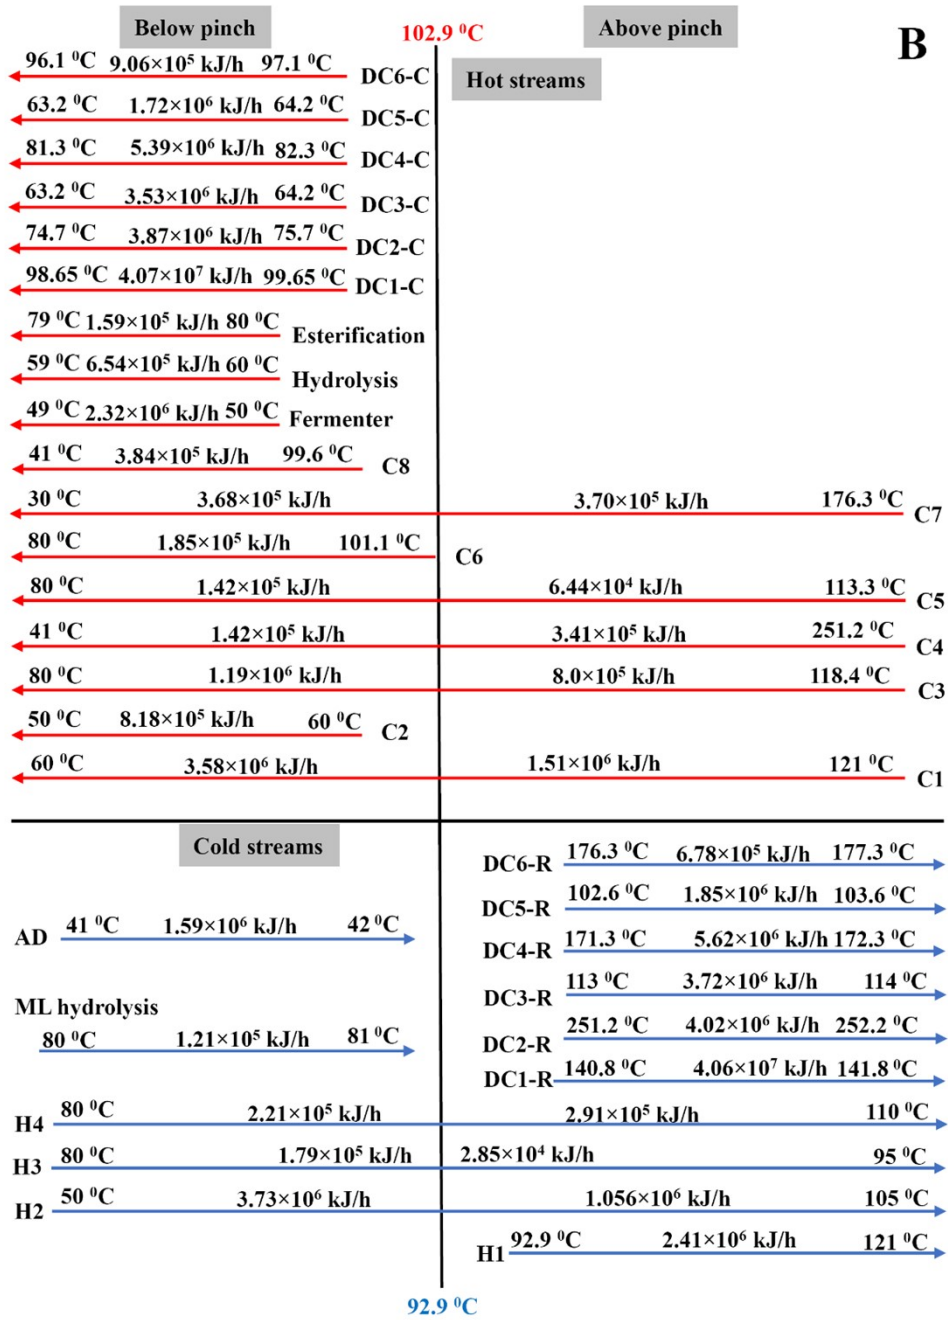

**Fig. S1.** (a) Heat exchanger network (HEN) and (b) grid diagram for Scenario II to produce lactic acid (LA) from 100 MT bread waste (BW) per day.
